# Supplementary material for: Contribution of Potential Evaporation Forecasts to 10-day streamflow forecast skill for the Rhine river
Source: Copernicus journal article supplement (doi:10.5194/hess-2018-506), 2018-10-24
Supplement: Supplementary file [file hess-2018-506-AC2-supplement.pdf]

# Contribution of Potential Evaporation Forecasts to 10-day streamflow forecast skill for the Rhine river - Answer to reviewer 2

Bart van Osnabrugge<sup>1,2</sup>, Remko Uijlenhoet<sup>2</sup>, and Albrecht Weerts<sup>1,2</sup>

<sup>1</sup>Deltares, Operational Water Management Department, Delft, The Netherlands

<sup>2</sup>Wageningen University, Hydrology and Quantitative Water Management Group, Wageningen, The Netherlands

**Correspondence:** Bart van Osnabrugge (Bart.vanOsnabrugge@deltares.nl)

Thank you for the review. The three main issues mentioned by this reviewer are: 1) figures generating  $P(X>x)$  rather than  $P(X<x)$ , 2) Forecast verifications conditioned on forecasts can be a more robust approach, 3) copy editing. In the following we will address each point. At the end we address also the minor issues raised by the reviewer.

## 1 $P(X>x)$ for claims on low flows

5 Although the comment about  $P(X<x)$  versus  $P(X>x)$  for evaluation of high and low flows respectively is correct in the sense that low  $P(X<x)$  evaluates for all data and not directly on low flows, there is still information about low flow forecasts to be found, namely in the shape of the curve.

We extracted information about low flows from the evaluation with  $P(X<x)$  by looking at the change in predictive skill over  $P(X<x)$ . For p.14 l.13-15: “In terms of bias, low values are slightly overestimated while high values are slightly underestimated, making the radiation forecasts slightly less extreme than the observations (fig.6)” we see in fig. 6 (row 3, Rg) that the relative mean error increases with lower  $P(X<x)$ . So how more low flow occurrences are added to the evaluated set, the more the relative mean error increases. This is only possible if low values are overestimated, which is what we claim. We understand that the explanation we give here was lacking so we will add this explanation.

15 Additionally, we performed the proposed analysis and plotted graphs for  $P(X>x)$  which showed that indeed low values are overestimated for Rg. (see attached Figure 1). However we think that adding the full explanation as written above is the best solution while adding the ‘inverse’ graph to the supplemental information including some explanatory text as not to disturb the flow of the article.

For p.19 l.1-3 “The uniform response of several skill scores for every percentile of observed discharge does not support this idea; there is no special gain for low flows” we would like to refer back to fig. 9 and apply a reasoning similar to the one above. 20 First we note that the scale of the last row where the differences are plotted is very, very small. Even if ‘diluted’ by the other observations in the set, a significant change for low flow values should show in this figure. Instead, the more low flow values are added to the evaluation set, the smaller the RME difference becomes.

Also here we did the proposed analysis to confirm our statement, see attached Figure 2. Here we see our initial conclusions confirmed as the differences are negligible between PET forcings. Additionally, the analysis gives some new insight in the

sensitivity of low flows to PET forcing. Looking at the 5d and 10d skill score, there is almost no loss of skill due to the combined forcing. In other words, the skill of an actual forecast is purely determined by the quality of the model and initial state. This can be readily explained by the fact that the lowest flows are caused by long periods of no rain. We will describe this in the result section.

- 5 Concerning the expectations that "Given that there are differences in the soil stores using the different forecasts PET forcing, then I would have expected there to be differences identified in streamflow forecasts for low flow conditions", we would like to respond that this indeed was our initial expectation and is indeed an expectation that is shared with many. It is one of the findings of this paper that this belief is untrue, at least for the conceptualization of the HBV model. This is because under dry conditions the HBV discharge is determined by the LowerZone storage and routing, without strong feedback mechanisms that
- 10 would drain the LowerZone through evaporation. We are happy to have carried out the suggested analysis because this has become now much more clear in the results. Note that we did look at 10-day forecasts and that all forecasts are run from the same initial state created, so the difference in state is deliberately not taken into account to isolate the effect of the forecasted forcing.

## 2 Verification conditioned on forecasts

- 15 If we understand correctly, you mean that we should take samples based on the forecasted values,  $P(F < f)$ , instead of observations,  $P(X < x)$ , so that scores are calculated for the 10% (etc) highest (lowest) forecasts and not for the highest (lowest) 10% observations. This then will inform the forecaster about the forecast quality based on the extremity of the forecast, not the unknown observation.

We studied the referenced paper with great interest. We see that such an analysis has merit, but do not think that it will add

20 to the topic of this paper which is focused on the effect of evaporation forecasting on streamflow forecasting. In particular we do not think that our conclusions are susceptible to the danger of evaluating models on only a subset of the data because we did calculate our metrics over the whole range of  $P(X < x)$ , and after your first suggestion for  $P(X > x)$ , and are not tuning our model. We have however added a recommendation for this analysis of forecast skills for future studies to further the awareness of this issue, including a reference to the mentioned article(s).

## 25 3 Copy editing

We will thoroughly check the manuscript for copy editing errors to our best efforts. We thank the reviewer for already pointing out several cases that need our attention.

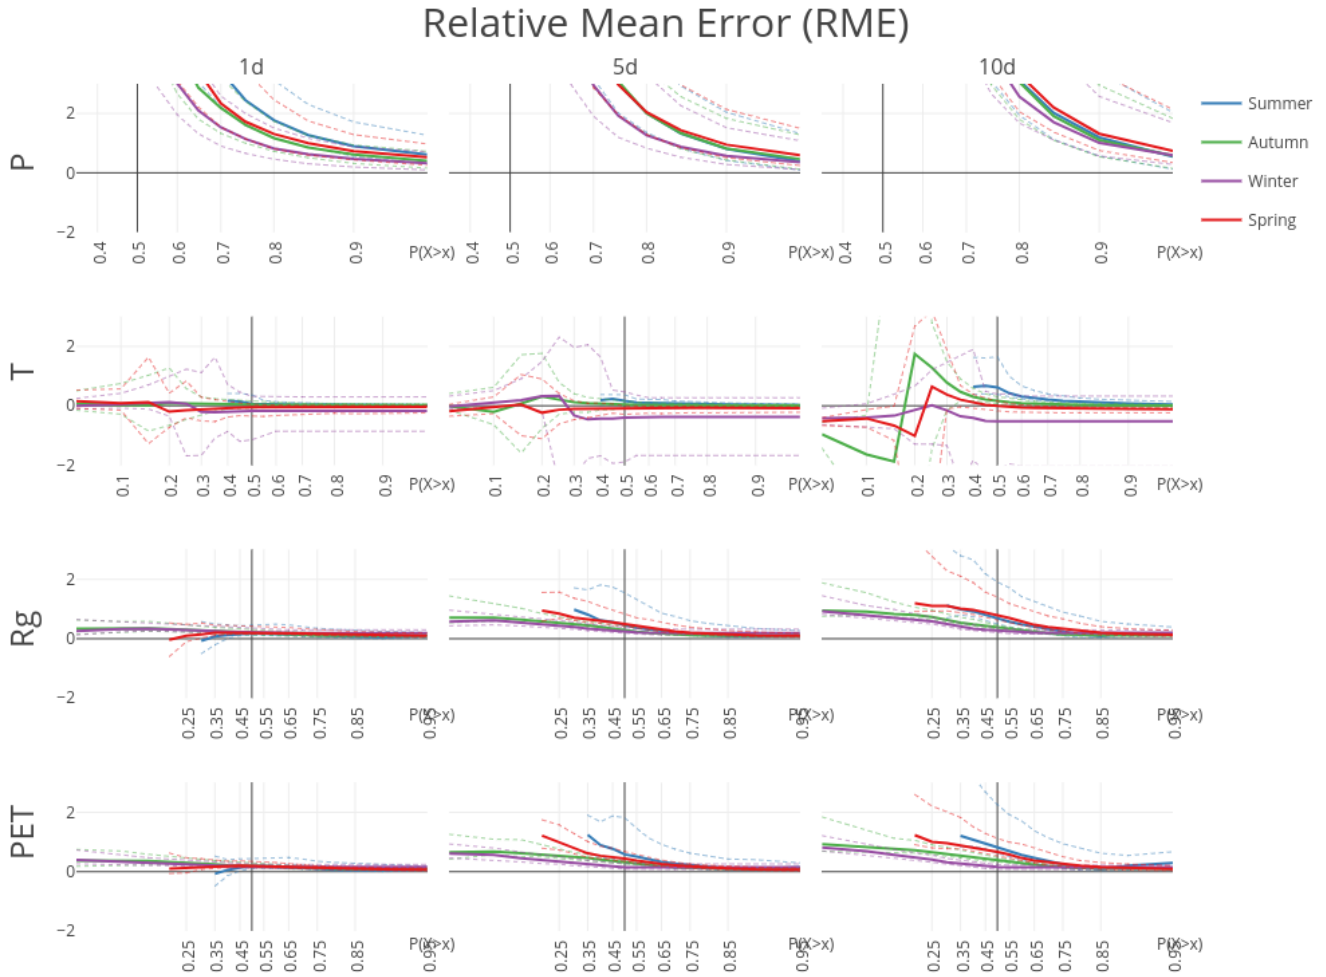

**Figure 1.** Relative Mean Error (RME) for the four forcing variables benchmarked against sample climatology for the 148 HBV subbasins for the whole year. RME is aggregated into mean (solid), 10th and 90th percentile (dashed). Note that radiation ( $R_g$  third row) is indeed overestimated for low extremes as presented in the main text. Additionally, the asymptotic behaviour of the RME of precipitation ( $P$ , first row) is caused by the large number of zero or close to zero events so that the relative error grows without bounds. In the inverse figure (for  $P(X < x)$ , Fig. 6) those zero values were automatically excluded. For temperature ( $T$ , second row) the RME is unstable for values around zero, but since actual exactly zero temperatures are rare, this remains within bounds albeit with a jump from positive to negative due to sign differences between observed and forecasted values.

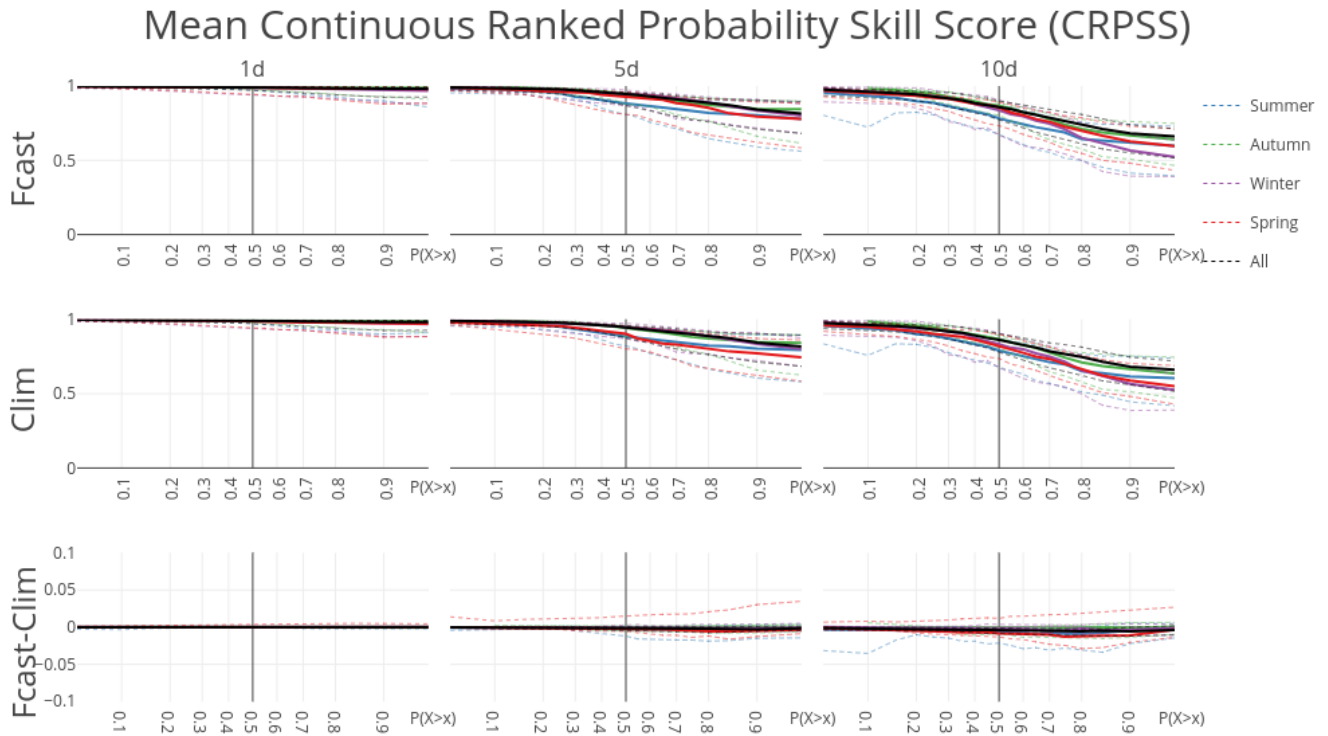

**Figure 2.** Continuous Ranked Probability Skill Score (CRPSS) for forecast runs (forecasted PET, climatological PET) and their difference benchmarked against model output for the 20 largest streams in the Rhine basin. CRPSS scores are aggregated into mean (solid), 10th and 90th percentile (dashed). Note that this is the inverse graph of Figure 8 (for  $P(X < x)$ ) in the main text.
